# Supplementary material for: A facile strategy to achieve fully bio-based epoxy thermosets from eugenol
Source: Royal Society of Chemistry journal article supplement (doi:10.1039/c9gc01184f), 2019-01-01
Supplement: c9gc01184f1.pdf [file c9gc01184f1.pdf]

## Supporting information

### A facile strategy to achieve fully bio-based epoxy thermosets from eugenol

Chien-Han Chen<sup>||§</sup>, Shih Huang Tung<sup>||§</sup>, Ru Jong Jeng<sup>\*||§</sup>, Mahdi M. Abu-Omar<sup>†</sup>, Ching-Hsuan Lin<sup>\*\*§</sup>

<sup>§</sup>Advanced Research Center for Green Materials Science and Technology, National Taiwan University, Taipei 10617, Taiwan.

<sup>||</sup>Institute of Polymer Science and Engineering, National Taiwan University, Taipei, Taiwan.

<sup>†</sup>Department of Chemistry and Biochemistry, University of California, Santa Barbara, California 93106, United States.

<sup>‡</sup>Department of Chemical Engineering, National Chung Hsing University, Taichung, Taiwan.

### Table of Contents

|                                                                                           |    |
|-------------------------------------------------------------------------------------------|----|
| <b>Fig. S1.</b> FTIR spectra of synthesized monomers in this work. ....                   | S2 |
| <b>Fig. S2.</b> A typical stress-strain curve of SC( <b>3</b> ) and ( <b>3</b> )/DDM..... | S3 |
| <b>Fig. S3.</b> (a) DMA and (b) DSC thermograms of (x)/DDM.....                           | S4 |
| <b>Fig. S4.</b> TGA thermograms of (x)/DDM. ....                                          | S5 |
| <b>Fig. S5.</b> Enlarged FTIR spectra of ( <b>4</b> ) and ( <b>4</b> )/DDM.....           | S6 |

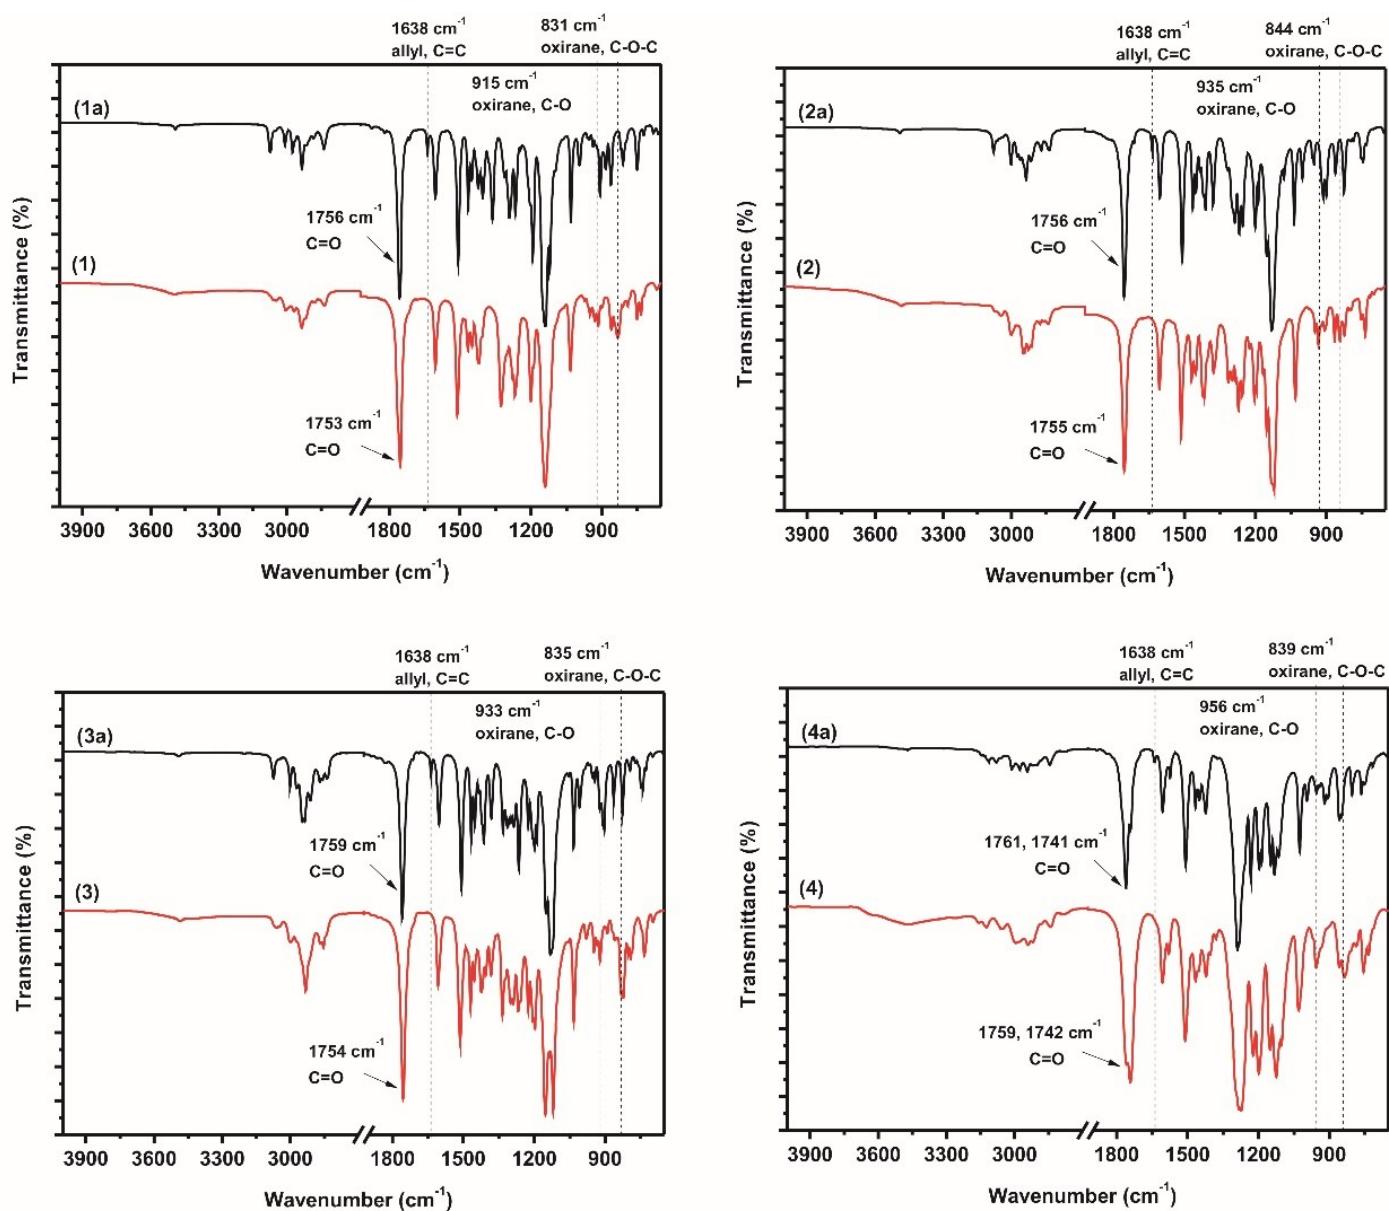

**Fig. S1.** FTIR spectra of synthesized monomers in this work.

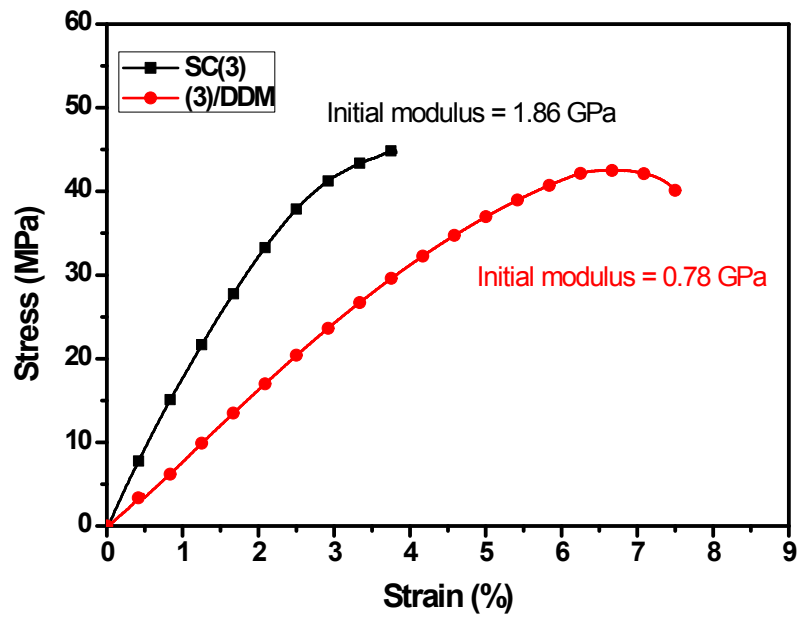

**Fig. S2.** A typical stress-strain curve of SC(3) and (3)/DDM. Note that the test was stopped due to the instrumental limitation, not due to the break of the thermoset.

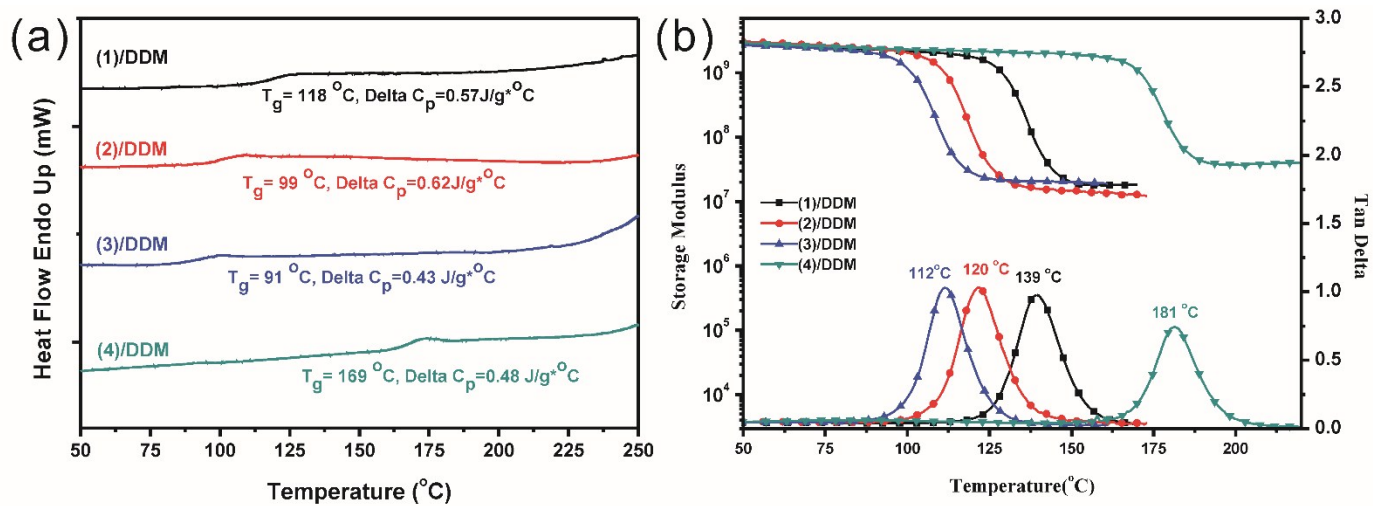

**Fig. S3.** (a) DSC and (b) DMA thermograms of (x)/DDM.

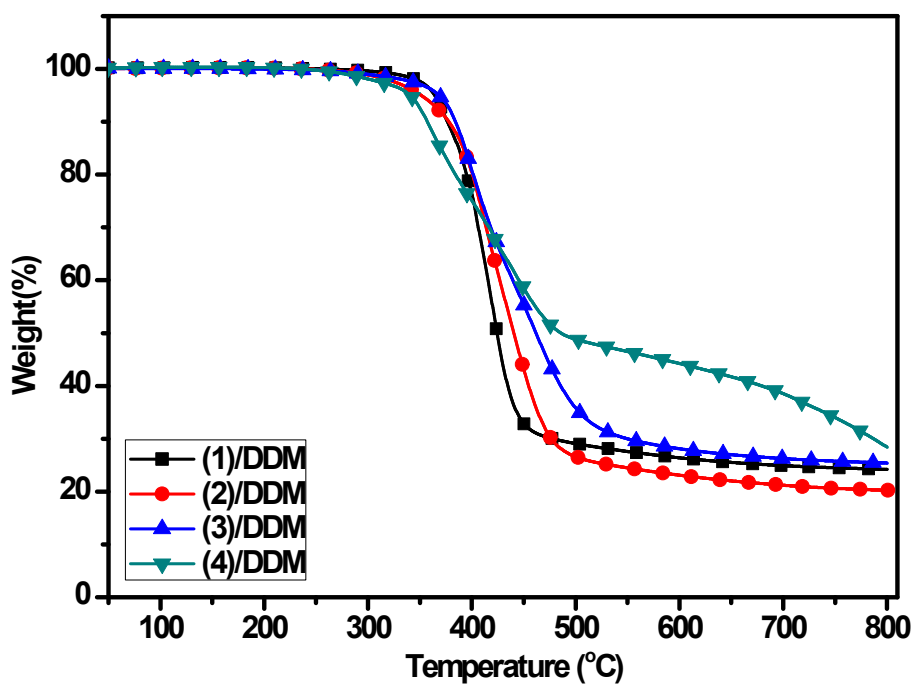

Fig. S4. TGA thermograms of (x)/DDM.

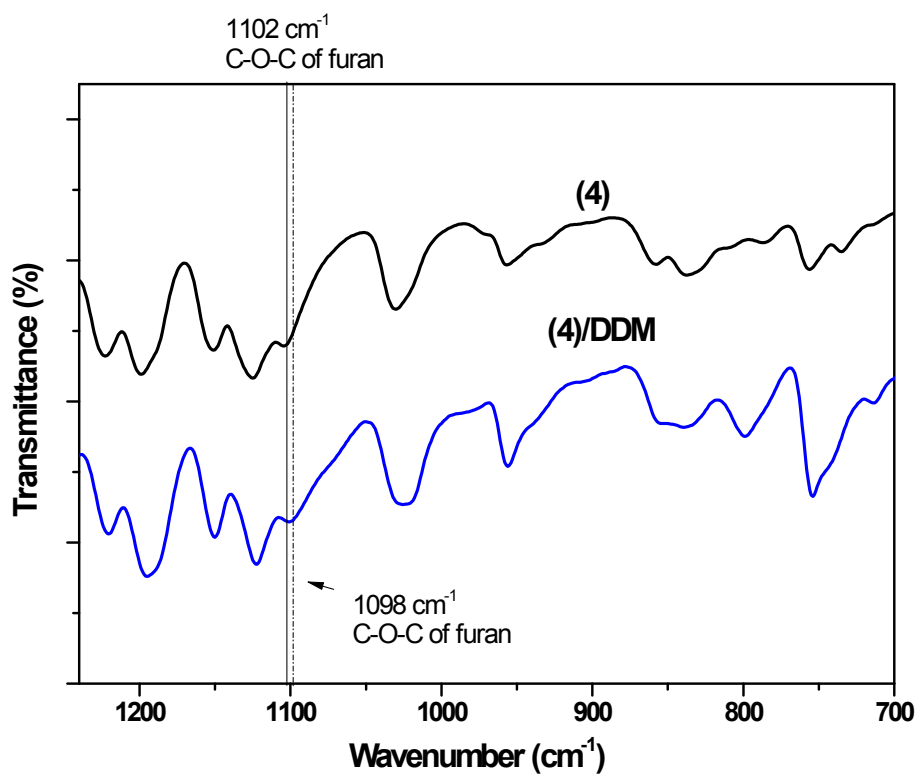

**Fig. S5.** Enlarged FTIR spectra of (4) and (4)/DDM.
